# Supplementary material
Source: publisher figshare collection journal article supplement (https://karger.figshare.com/ndownloader/files/8717476)
Supplement: Supplementary file 1 [file 8717476]

Table 2: Significant risk factors for SIRS on multivariate analysis

| Factor | Odds Ratio | p Value |
| --- | --- | --- |
| Operative Time | 1.015616 | 0.036 |
| Age | .9678901 | 0.044 |
| Stone Culture | 8.853323 | 0.000 |
| RPUC | 3.888079 | 0.049 |
